# Supplementary material for: Integrated mRNA and miRNA Expression Profile Analysis of Female and Male Gonads in Acrossocheilus fasciatus
Source: MDPI journal article supplement (doi:10.3390/biology11091296), 2022-08-31
Supplement: s1 [file s1]

**Table S1.** Sequences primers of genes were used in the study

| Primer                | Sequence (5'-3' direction)      | Purpose  |
|-----------------------|---------------------------------|----------|
| <i>dazl</i> -F        | GAAGGTGGACGAGAACGAGAT           | qRT-PCR  |
| <i>dazl</i> -R        | TGGAGATGACATGGAACGAGAA          |          |
| <i>piwil1</i> -F      | TACCGAGATGGAGTTGGAGAC           | qRT-PCR  |
| <i>piwil1</i> -R      | TGGACGAGTGACTTCAGTGT            |          |
| <i>piwil2</i> -F      | GATTACCGACAGACGAGGGAGG          | qRT-PCR  |
| <i>piwil2</i> -R      | AACCTGGGCAATCGCTGGAG            |          |
| <i>vasa</i> -F        | CCGTGATGGTGGTAATGAAGAG          | qRT-PCR  |
| <i>vasa</i> -R        | CTGGCTTGTCTGCTGTTGAG            |          |
| <i>amh</i> -F         | TTCAACAGTCATTCCATCCATCC         | qRT-PCR  |
| <i>amh</i> -R         | GACACATTGCTGCCATCTACTT          |          |
| <i>dmrt1</i> -F       | CGCCAGCAGTGTTACCGTCTCT          | qRT-PCR  |
| <i>dmrt1</i> -R       | AGGCATCCACCATCAGGTCAGA          |          |
| <i>figla</i> -F       | GAATCAACTACTCCAGCAGTGAGAC       | qRT-PCR  |
| <i>figla</i> -R       | TCTGAGCCAACCTGAACAATGTAC        |          |
| <i>zar1</i> -F        | GCGAGGAGAGCGTGAAGGAA            | qRT-PCR  |
| <i>zar1</i> -R        | GGACACACCACACATAAGCACTTT        |          |
| <i>zp3</i> -F         | GTGGATGTCCTGTTGTTGCT            | qRT-PCR  |
| <i>zp3</i> -R         | GCGTTATTGCTTACACCTTGAA          |          |
| $\beta$ -actin-qF     | CCTATTGAGCACGGTATTG             | Internal |
| $\beta$ -actin-qR     | CTGTTGGCTTTGGGATTG              | control  |
| <i>piwi1</i> -3'UTR-F | TCTAGAGCATTGCAGTGACAAGTTGCAG    | 3'UTR    |
| <i>piwi1</i> -3'UTR-R | GTCGACGCTCTTCCCAACATTTCTGATCTGT | cloning  |
| <i>piwil2</i> -CDS-F  | TCTAGAATGGATCCAAAGCGACCTCC      | CDS      |
| <i>piwil2</i> -CDS-R  | CTCGAGCAGGAAGAACAGTTTCTCTG      | cloning  |

Table S2. Sequences primers of miRNAs were used in the study

| Primer         | Sequence(5'-3' direction)                          | Purpose  |
|----------------|----------------------------------------------------|----------|
| miR-202-5p-FW  | GCGCGCTTCCTATGCATATACCTC                           | qRT-PCR  |
| miR-202-5p-SL  | GTCGTATCCAGTGCAGGGTCCGAGGTATTTCGCACTGGATACGACCAAA  |          |
| miR-217-FW     | GCGCTACTGCATCAGGAAGTAT                             | qRT-PCR  |
| miR-217-SL     | GTCGTATCCAGTGCAGGGTCCGAGGTATTTCGCACTGGATACGACCCAAT |          |
| miR-725-3p-FW  | GCGCGCTTCAGTCATTGTTTCTAGT                          | qRT-PCR  |
| miR-725-3p-SL  | GTCGTATCCAGTGCAGGGTCCGAGGTATTTCGCACTGGATACGACACTAC |          |
| miR-141-3p-FW  | GCGCTAACACTGTCTGGTAACGA                            | qRT-PCR  |
| miR-141-3p-SL  | GTCGTATCCAGTGCAGGGTCCGAGGTATTTCGCACTGGATACGACGCATC |          |
| miR-22a-5p-FW  | GCAGTTCTTCACTGGCAAGCT                              | qRT-PCR  |
| miR-22a-5p-SL  | GTCGTATCCAGTGCAGGGTCCGAGGTATTTCGCACTGGATACGACTAAAG |          |
| miR-22b-5p-FW  | GCCGTTCTTCACTGGCTAGCT                              | qRT-PCR  |
| miR-22b-5p-SL  | GTCGTATCCAGTGCAGGGTCCGAGGTATTTCGCACTGGATACGACTAAAG |          |
| miR-222a-5p-FW | GCGCTGCTCAGTAGTCAGTGTAGA                           | qRT-PCR  |
| miR-222a-5p-SL | GTCGTATCCAGTGCAGGGTCCGAGGTATTTCGCACTGGATACGACGGATC |          |
| miR-26a-3p-FW  | GCGCCCTATTCGGGATGACTTGG                            | qRT-PCR  |
| miR-26a-3p-SL  | GTCGTATCCAGTGCAGGGTCCGAGGTATTTCGCACTGGATACGACGAACC |          |
| miR-10d-5p-FW  | GCGCTACCCTGTAGAACCGAATGT                           | qRT-PCR  |
| miR-10d-5p-SL  | GTCGTATCCAGTGCAGGGTCCGAGGTATTTCGCACTGGATACGACCACAC |          |
| U6-F           | GGAACGATACAGAGAAGATTAGC                            | Internal |
| U6-R           | TGGAACGCTTCACGAATTTCG                              | control  |

Table S3. Summary statistics of the gonadal transcriptome of *A. fasciatus*

| Sample | raw_reads | clean_reads | valid_bases | Q30    | GC      |
|--------|-----------|-------------|-------------|--------|---------|
| Afa_O1 | 49598114  | 48707862    | 94.59%      | 95.46% | 48.03%  |
| Afa_O2 | 49000608  | 48129490    | 93.95%      | 95.57% | 48.25%  |
| Afa_O3 | 49026134  | 48158504    | 94.65%      | 95.58% | 48.18%  |
| Afa_T1 | 49712636  | 48777880    | 94.45%      | 95.54% | 47.61 % |
| Afa_T2 | 49810260  | 48956150    | 95.51 %     | 95.94% | 47.50%  |
| Afa_T3 | 49458862  | 48576222    | 95.29%      | 95.98% | 47.54%  |

Table S4. Numbers of unigenes with annotation results in different databases

| Anno Database | Annotated Number | 300<=length<1000 | length>=1000    |
|---------------|------------------|------------------|-----------------|
| NR            | 32321 (65.36 %)  | 13279 (26.86 %)  | 19042 (38.51 %) |
| Swissprot     | 26396 (53.38 %)  | 8823 (17.84 %)   | 17573 (35.54 %) |
| KEGG          | 15493 (31.33 %)  | 5147 (10.41 %)   | 10346 (20.92 %) |
| KOG           | 19561 (39.56 %)  | 6119 (12.37 %)   | 13442 (27.18 %) |
| eggNOG        | 28937 (58.52 %)  | 10792 (21.83 %)  | 18145 (36.70 %) |
| GO            | 23994 (48.52 %)  | 8033 (16.25 %)   | 15961 (32.28 %) |
| Pfam          | 43 (0.09 %)      | 32 (0.06 %)      | 11 (0.02 %)     |

**Table S5.** Analysis of differentially expressed miRNAs between male and female

| miRNA_id       | baseMean_control<br>_Male | baseMean_case_<br>Female | foldChange | pval     | up_down |
|----------------|---------------------------|--------------------------|------------|----------|---------|
| dre-let-7f     | 2406.667946               | 22283.797475             | 9.259190   | 0.000888 | Up      |
| dre-let-7g     | 2588.510593               | 2528.188532              | 4.839921   | 0.026250 | Up      |
| dre-let-7j     | 2877.800496               | 15534.319538             | 5.397983   | 0.015753 | Up      |
| dre-miR-122    | 1242.193130               | 4619.794734              | 3.719063   | 0.022162 | Up      |
| dre-miR-124-3p | 43.481124                 | 0.408885                 | 0.009403   | 0.002837 | Down    |
